# Supplementary material for: Evaluation of three solvent-based recycling pathways for circular polypropylene
Source: Royal Society of Chemistry journal article supplement (doi:10.1039/d4gc02646b), 2024-12-10
Supplement: d4gc02646b1.pdf [file d4gc02646b1.pdf]

## Supplementary Information for:

### Evaluation of Three Solvent-based Recycling Pathways for Circular Polypropylene

Benjamin Caudle, Thuy T.H. Nguyen\*, Sho Kataoka

National Institute of Advanced Industrial Science and Technology, 1-1-1 Higashi, Tsukuba, Ibaraki, Japan 305-8565

\*Corresponding author email: [nguyen.thuy@aist.go.jp](mailto:nguyen.thuy@aist.go.jp)

#### S1. Base Case Equipment and Select Stream Details

The following sections provide more detailed information on the model results for each case. Both important stream information and process equipment sizing data are included.

##### S1.1. Solvent-Antisolvent Process

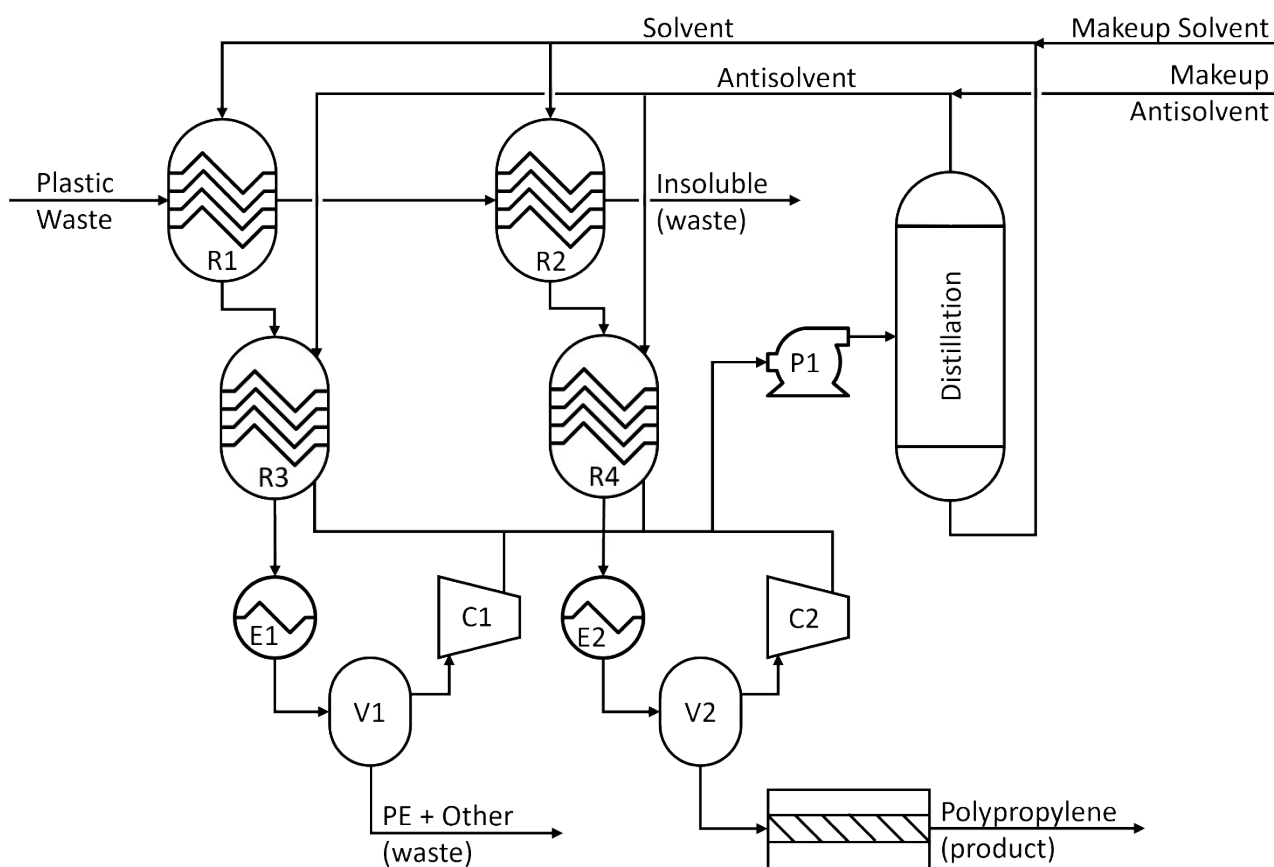

**Figure S1.** Simplified process flow diagram for the SA process. Process equipment (C for compressors, E for heat exchangers, P for pumps, R for heated semi-batch vessels, and V for vessels) is included in the following equipment table. Labeled streams are included in the following stream table. The Distillation column includes a column, feed preheater, reboiler, and condenser.

**Table S1.** SA process equipment list.

| Compressors       | Shaft Work (kW)          | Inlet P. (kPa)  | Outlet P. (kPa) |
|-------------------|--------------------------|-----------------|-----------------|
| C1                | 5.6                      | 2               | 101             |
| C2                | 46.5                     | 2               | 101             |
| Column            | Diameter (m)             | Height (m)      |                 |
| Column            | 2.7                      | 4.9             |                 |
| Pump              | Shaft Work (kW)          | Outlet P. (kPa) |                 |
| P1                | 0.5                      | 111.5           |                 |
| Heat Exchangers   | Area (m <sup>2</sup> )   | Duty (MJ/hr)    | Fluid           |
| R1/R2 (3 vessels) | 7.1                      | 514~851         | MP Steam        |
| R3 (2 vessels)    | 24.8                     | 2578            | Cooling Water   |
| R4 (2 vessels)    | 177.1                    | 19588           | Cooling Water   |
| E1                | 0.6                      | 213             | HP Steam        |
| E2                | 8.8                      | 2364            | HP Steam        |
| Column Preheater  | 103.8                    | 19691           | LP Steam        |
| Column Reboiler   | 189.0                    | 25614           | MP Steam        |
| Column Condenser  | 156.5                    | 24365           | Cooling Water   |
| C1 Interstage     | 0.4                      | 80              | Cooling Water   |
| C2 Interstage     | 3.6                      | 784             | Cooling Water   |
| Process Vessels   | Volume (m <sup>3</sup> ) | Pressure (kPa)  |                 |
| R1/R2 (3 vessels) | 18.1                     | 101             |                 |
| R3 (2 vessels)    | 2.9                      | 101             |                 |
| R4 (2 vessels)    | 19.1                     | 101             |                 |
| V1                | 4.0                      | 2               |                 |
| V2                | 105.6                    | 2               |                 |

**Table S2.** SA process abridged stream table.

| <b>Stream (Summary)</b> | <b>Units</b> | <b>Plastic Waste</b> | <b>Solvent</b> | <b>Antisolvent</b> | <b>Insoluble</b> | <b>PE + Other</b> | <b>PP Product</b> | <b>Makeup Solvent</b> | <b>Makeup Antisolvent</b> |
|-------------------------|--------------|----------------------|----------------|--------------------|------------------|-------------------|-------------------|-----------------------|---------------------------|
| Phase                   |              | Solid                | Liquid         | Liquid             | Wet Solid        | Wet Solid         | Solid             | Liquid                | Liquid                    |
| Total Mass Rate         | kg/hr        | 5000                 | 26682          | 62161              | 571              | 482               | 3977              | 26                    | 5.1                       |
| Temperature             | °C           | 25.0                 | 132.9          | 69.6               | 140.0            | 163.9             | 214.8             | 25.0                  | 25.0                      |
| Pressure                | kPa          | 1.0                  | 1.0            | 1.0                | 1.0              | 1.0               | 1.0               | 1.0                   | 1.0                       |
| Component Mass Rates    | kg/hr        |                      |                |                    |                  |                   |                   |                       |                           |
| XYLENE                  |              |                      | 26035          | 2281               | 19               | 2.1               | 4.7               | 26                    | 5.1                       |
| HEXANE                  |              |                      | 643            | 59880              | 0.5              | 1.2               | 3.3               |                       |                           |
| POLYPROPYLENE           |              | 3950                 | 4.0            |                    | 3.0              | 3.9               | 3943              |                       |                           |
| POLYETHYLENE            |              | 500                  | 0.5            |                    |                  | 475               | 25                |                       |                           |
| OTHER (PET)             |              | 550                  | 0.0            |                    | 549              | 0.5               | 0.5               |                       |                           |

## S1.2. Temperature Swing Process

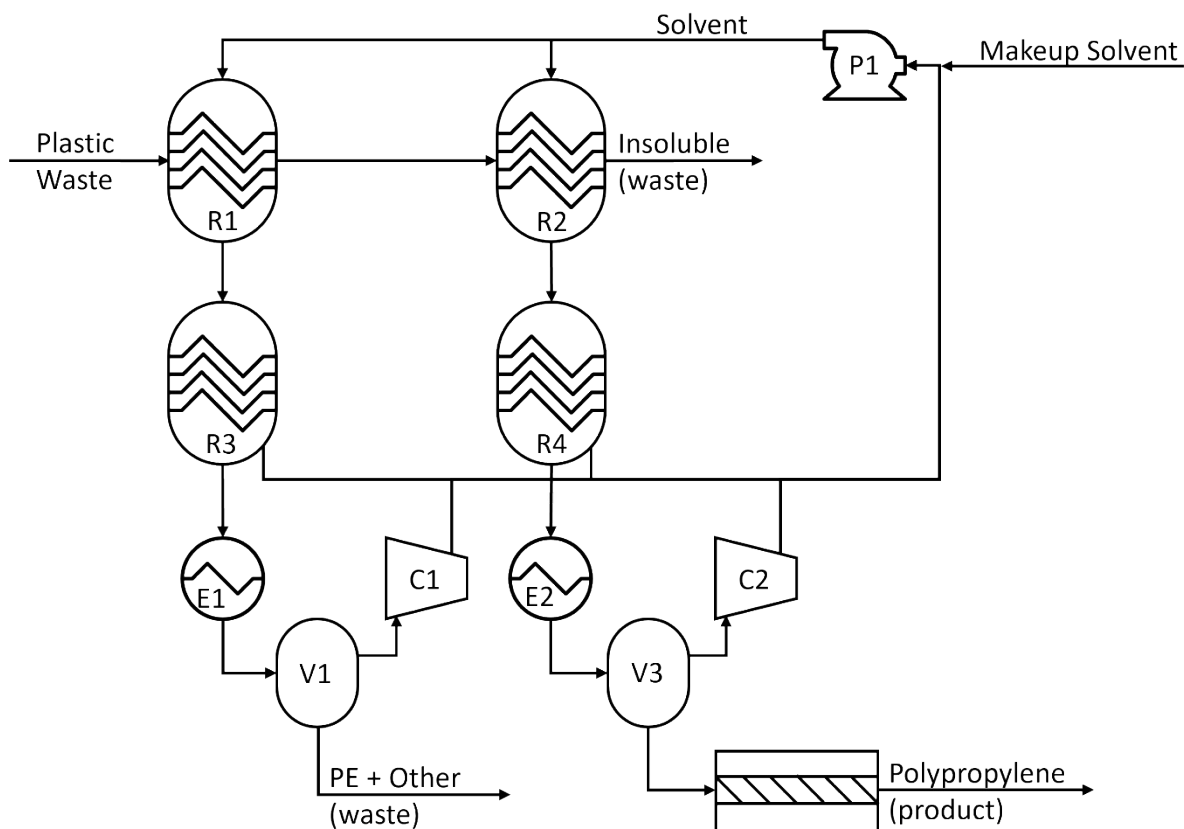

**Figure S2.** Simplified process flow diagram for TS process.

**Table S3.** TS process equipment list.

| Compressors       | Shaft Work (kW)          | Inlet P. (kPa)  | Outlet P. (kPa) |
|-------------------|--------------------------|-----------------|-----------------|
| C1                | 28.7                     | 2               | 101             |
| C2                | 244.2                    | 2               | 101             |
| Pumps             | Shaft Work (kW)          | Outlet P. (kPa) |                 |
| P1                | 0.1                      | 111             |                 |
| Heat Exchangers   | Area (m <sup>2</sup> )   | Duty (MJ/hr)    | Fluid           |
| R1/R2 (3 vessels) | 20.4                     | 1076~3994       | MP Steam        |
| R3 (2 vessels)    | 5.2                      | 509             | Cooling Water   |
| R4 (2 vessels)    | 43.9                     | 5771            | Cooling Water   |
| E1                | 1.4                      | 483             | HP Steam        |
| E2                | 23.8                     | 5638            | HP Steam        |
| C1 Interstage     | 1.3                      | 330             | Cooling Water   |
| C2 Interstage     | 12.7                     | 3625            | Cooling Water   |
| Process Vessels   | Volume (m <sup>3</sup> ) | Pressure (kPa)  |                 |
| R1/R2 (3 vessels) | 17.7                     | 101             |                 |
| R3 (2 vessels)    | 0.7                      | 101             |                 |
| R4 (2 vessels)    | 5.2                      | 101             |                 |
| V1                | 97.6                     | 2               |                 |
| V2                | 29.6                     | 2               |                 |

**Table S4.** TS process abridged stream table.

| Stream (Summary)    | Units | Plastic Waste | Solvent | Insoluble | PE + Other | PP Product | Makeup Solvent |
|---------------------|-------|---------------|---------|-----------|------------|------------|----------------|
| Phase               |       | Solid         | Liquid  | Wet Solid | Wet Solid  | Solid      | Liquid         |
| Total Mass Rate     | kg/hr | 5000          | 26039   | 571       | 499        | 3988       | 58             |
| Temperature         | °C    | 25.0          | 60.3    | 140.0     | 128.0      | 208.5      | 25.0           |
| Pressure            | bar   | 1.0           | 1.0     | 1.0       | 1.0        | 1.0        | 1.0            |
| Component Mas Rates | kg/hr |               |         |           |            |            |                |
| XYLENE              |       |               | 26035   | 19        | 20         | 19         | 58             |
| POLYPROPYLENE       |       | 3950          | 4.0     | 3.0       | 3.9        | 3943       |                |
| POLYETHYLENE        |       | 500           | 0.5     | 0.0       | 475        | 25         |                |
| OTHER (PET)         |       | 550           | 0.0     | 549       | 0.5        | 0.5        |                |

*S1.3. Supercritical Solvent Process*

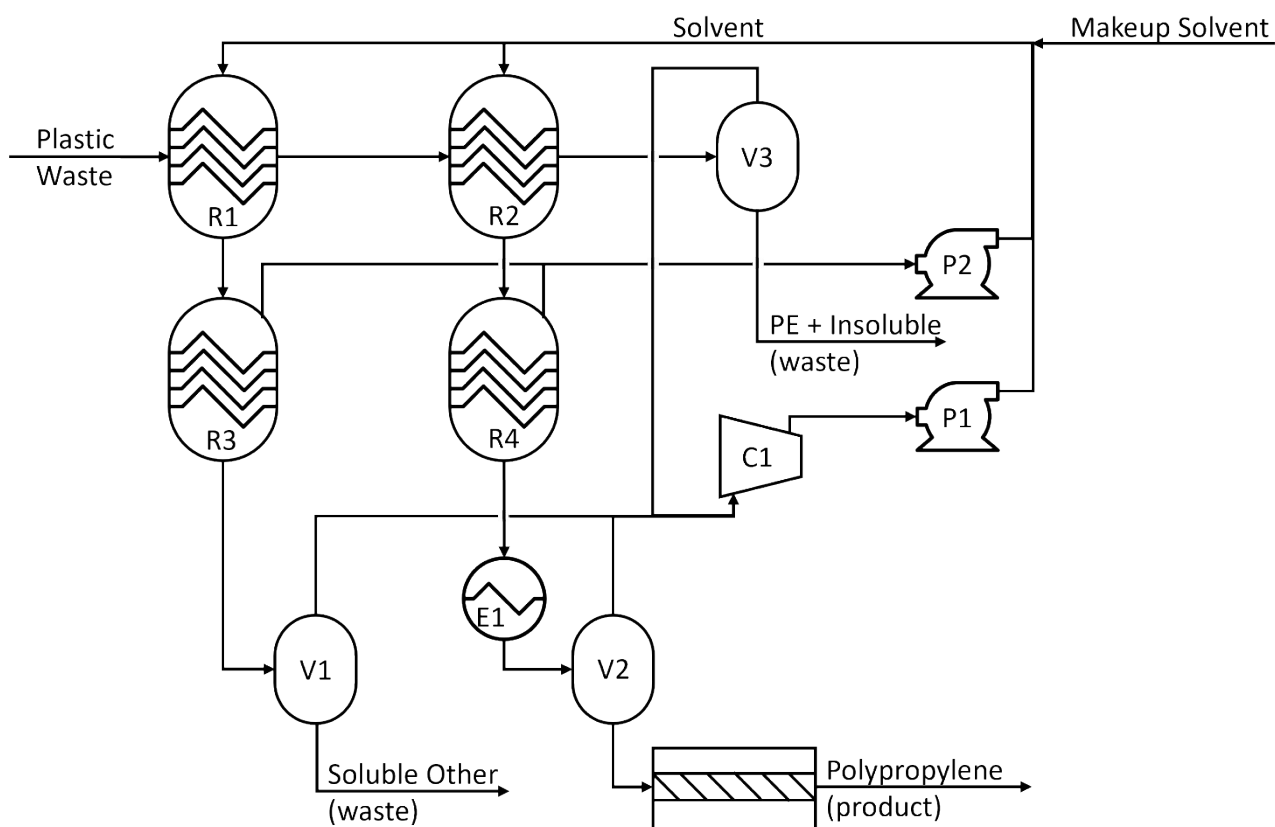

**Figure S3.** Process flow diagram for SS process.

**Table S5.** SS process equipment list.

| Compressors       | Shaft Work (kW)        | Inlet P. (kPa) | Outlet P. (kPa) |
|-------------------|------------------------|----------------|-----------------|
| C1                | 117.1                  | 101            | 4000            |
| Pumps             | Shaft Work (kW)        | Inlet P. (kPa) | Outlet P. (kPa) |
| P1                | 29.5                   | 4000           | 25000           |
| P2                | 188.5                  | 20000          | 25000           |
| Makeup Pump       | 0.2                    | 1200           | 25000           |
| Heat Exchangers   | Area (m <sup>2</sup> ) | Duty (MJ/hr)   | Fluid           |
| R1/R2 (3 vessels) | 10.9                   | 411~1476       | MP Steam        |
| R3 (2 vessels)    | 0.8                    | 165            | Cooling Water   |
| R4 (2 vessels)    | 5.6                    | 1786           | Cooling Water   |
| E1                | 5.0                    | 1217           | HP Steam        |
| C1 Interstage     | 3.2                    | 688            | Cooling Water   |

| Vessels           | Volume (m <sup>3</sup> ) | Pressure (kPa) |
|-------------------|--------------------------|----------------|
| R1/R2 (3 vessels) | 26.6                     | 25000          |
| R3 (2 vessels)    | 1.3                      | 20000          |
| R4 (2 vessels)    | 8.8                      | 20000          |
| V1                | 0.1                      | 101            |
| V2                | 0.2                      | 101            |
| V3                | 0.1                      | 101            |

**Table S6.** SS process abridged stream tables.

| <b>Stream (Summary)</b> | <b>Units</b> | <b>Plastic Waste</b> | <b>Solvent</b> | <b>PE + Insoluble</b> | <b>Soluble Other</b> | <b>PP Product</b> | <b>Makeup Solvent</b> |
|-------------------------|--------------|----------------------|----------------|-----------------------|----------------------|-------------------|-----------------------|
| Phase                   |              | Solid                | SC Fluid       | Solid                 | Solid                | Solid             | SC Fluid              |
| Total Mass Rate         | kg/hr        | 5000                 | 23650          | 504                   | 527                  | 3978              | 10                    |
| Temperature             | °C           | 25.0                 | 116.5          | 134.5                 | 49.9                 | 221.0             | 48.1                  |
| Pressure                | bar          | 1.0                  | 250.0          | 1.0                   | 1.0                  | 1.0               | 250.0                 |
| Component Mass Rates    | kg/hr        |                      |                |                       |                      |                   |                       |
| PROPANE                 |              |                      | 23646          | 0.5                   | 6.3                  | 3.5               | 10                    |
| POLYPROPYLENE           |              | 3950                 | 3.9            | 5.1                   | 3.9                  | 3941              |                       |
| POLYETHYLENE            |              | 500                  | 0.0            | 499                   | 0.5                  | 0.5               |                       |
| OTHER (PET)             |              | 550                  | 0.6            | 0.0                   | 517                  | 33                |                       |

## S2. Calculations for Process Economics

The process for calculating NPV, along with intermediate economic indicators such as capital cost and cash flow, is described by Turton et al.<sup>[1]</sup> The NPV in project year n,  $NPV_n$ , can be calculated from the sum of discounted cash flows:

$$NPV_n = -C_{TM} + \sum_{i=1}^n \frac{ATP}{(1-r)^i} \quad (S1)$$

where  $C_{TM}$  is the total module cost, or capital expenses (CAPEX), ATP is the annual after-tax profit, and r is the internal rate of return. The total module cost is the sum of the bare module cost,  $C_{BM}$ , of all pieces of equipment, p, multiplied by a factor that accounts for contingency and fees.:

$$C_{TM} = 1.18 \sum_{i=1}^p C_{BM,i} \quad (S2)$$

The total module costs are assumed to be invested in the three years leading up to the start of plant operation. Beginning in year 1, the annual after-tax profit is:

$$ATP = (R - COM - d_k)(1 - t) + d_k \quad (S3)$$

where R is revenue from the sales of products (PP, waste plastic), COM is the cost of manufacturing,  $d_k$  is depreciation, and t is the effective tax rate.

The annual cost of manufacturing, COM, is calculated with the equation:

$$COM = 0.18C_{TM} + 2.73C_{OL} + 1.23(C_{RM} + C_{UT} + C_{WT}) \quad (S4)$$

where  $C_{OL}$  is the cost of operating labor,  $C_{RM}$  is the cost of raw materials,  $C_{UT}$  is the cost of utilities, and  $C_{WT}$  is the cost of waste treatment.  $C_{RM}$ ,  $C_{UT}$ , and  $C_{WT}$  are based on the material balance and the prices of raw materials and utilities discussed in Section 2.3. The cost of operating labor is based on the number of pieces of major process equipment and solids handling sections. Depreciation is calculated linearly over the first five years of operation and a negligible salvage value is assumed.

## References

- [1] R. Turton, R. C. Bailie, W. B. Whiting, J. A. Sheaiwitz, D. Bhattacharyya, *Analysis, Synthesis, and Design of Chemical Processes*, Fourth ed., Prentice Hall, Tokyo, **2012**.
